# Supplementary material
Source: publisher figshare collection journal article supplement (https://acs.figshare.com/ndownloader/files/3609993)
Supplement: Supplementary file 1 [file 3609993]

## Supporting Information:

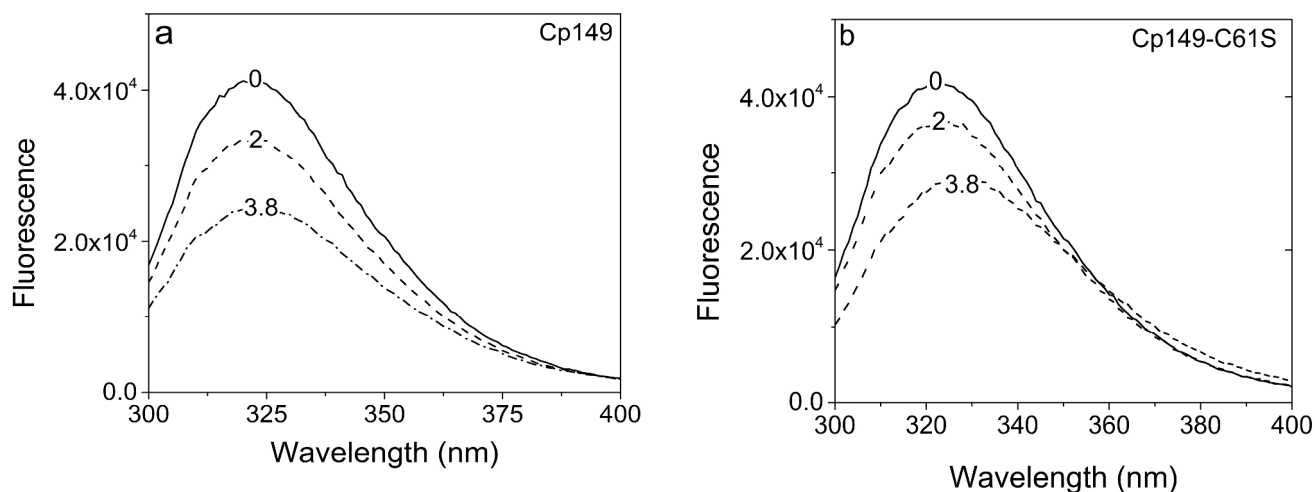

**Supplementary Figure 1:** Fluorescence emission spectrum of intrinsic tryptophan fluorescence of a) Cp149 b) Cp149-C61S in different concentrations of urea. Observed peak wavelengths of for Cp149 are: 0M – 321 nm, 2 M – 321 nm, 3.8 M – 323 nm; and for Cp149-C61S are 0 M – 321 nm, 2 M – 321 nm, 3.8 M – 329 nm. No protein unfolding could be observed even at incubation with 3.8 M urea.

### Supplementary methods:

**Fluorescence spectroscopy:** Intrinsic tryptophan fluorescence was recorded for 2.5  $\mu$ M protein of Cp149 and Cp149-C61S in 50mM HEPES pH 7.5 and 300mM NaCl under varying concentration of urea. Fluorescence was recorded as an emission spectrum with an excitation wavelength of 280nm. Urea was always freshly prepared in 50mM TrisHCl pH 7.5 + 300mM NaCl.
